# Supplementary material for: Analysis of Effectiveness, Safety, and Bleeding Related to Rivaroxaban in Elderly Patients
Source: PubMed Central journal article supplement — Clin Appl Thromb Hemost. 2020 May 26;26:1076029620925923. doi: 10.1177/1076029620925923 (PMC7370546; doi:10.1177/1076029620925923), 2020-05-26
Supplement: Supplementary_Table_1.pdf [file Supplementary_Table_1.pdf]

**Supplementary Table 1.** Comparison of bleeding in patients receiving different daily doses of Rivaroxaban

| Bleeding   | 10mg QD   | 15mg QD   | 10mg BID  | First 15 mg BID after |         | $\chi^2$ | <i>P</i> |
|------------|-----------|-----------|-----------|-----------------------|---------|----------|----------|
|            |           |           |           | 21 days was changed   | to 20mg |          |          |
| Yes, n (%) | 3 (3.1)   | 4 (5.4)   | 8 (10.3)  | 10 (20.0) *           |         | 12.241   | <0.001   |
| No, n (%)  | 94 (96.9) | 70 (94.6) | 70 (89.7) | 40 (80.0)             |         |          |          |

The \* represents a statistically significant difference compared to the 10 mg QD group (P<0.008)
