# Supplementary material for: Analysis of Effectiveness, Safety, and Bleeding Related to Rivaroxaban in Elderly Patients
Source: PubMed Central journal article supplement — Clin Appl Thromb Hemost. 2020 May 26;26:1076029620925923. doi: 10.1177/1076029620925923 (PMC7370546; doi:10.1177/1076029620925923), 2020-05-26
Supplement: Supplementary_Table_2.pdf [file Supplementary_Table_2.pdf]

**Supplementary Table 2** Comparison of new thrombus in patients receiving different daily doses of Rivaroxaban

| New<br>Thrombus | 10mg QD    | 15mg QD   | 10mg BID | First 15 mg BID after 21    | <i>P</i> |
|-----------------|------------|-----------|----------|-----------------------------|----------|
|                 |            |           |          | days was changed to<br>20mg |          |
| Yes, n (%)      | 0 (0.0)    | 1 (1.4)   | 1 (1.3)  | 0 (0.0)                     | 0.765    |
| No, n (%)       | 97 (100.0) | 73 (98.6) | 77(98.7) | 50 (100.0)                  |          |
