# Supplementary material for: Analysis of Effectiveness, Safety, and Bleeding Related to Rivaroxaban in Elderly Patients
Source: PubMed Central journal article supplement — Clin Appl Thromb Hemost. 2020 May 26;26:1076029620925923. doi: 10.1177/1076029620925923 (PMC7370546; doi:10.1177/1076029620925923), 2020-05-26
Supplement: Supplementary_Table_3.pdf [file Supplementary_Table_3.pdf]

**Supplementary Table 3.** Comparison of bleeding in different age groups

| Bleeding   | 60~69      | 70~79      | ≥80         | $\chi^2$ | <i>P</i> |
|------------|------------|------------|-------------|----------|----------|
| Yes, n (%) | 5 (3.7)    | 9 (8.3)    | 11 (19.6) * | 13.053   | 0.001    |
| No, n (%)  | 129 (96.3) | 100 (91.7) | 45 (80.4)   |          |          |

The \* represents a statistically significant difference compared to the 60~69 years old group (P<0.016)
